# Supplementary material
Source: PubMed Central journal article supplement (PMC5244312)

## Supplementary Figures

**Figure S1.** Three-dimensional structure of *S. aureus* IPLA16 and *E. faecium* MMRA (A and B), *L. plantarum* 55-1 (C and D), *L. pentosus* A1 (E and F) or *L. pentosus* B1 (G and H) dual-species biofilms. Images correspond to 5 h biofilms treated with SM buffer (A, C, E and G) or phage phiIPLA-RODI for 4 h (B, D, F and H). Biofilms were stained with SYTO® 9, which dyes cells from all species green.

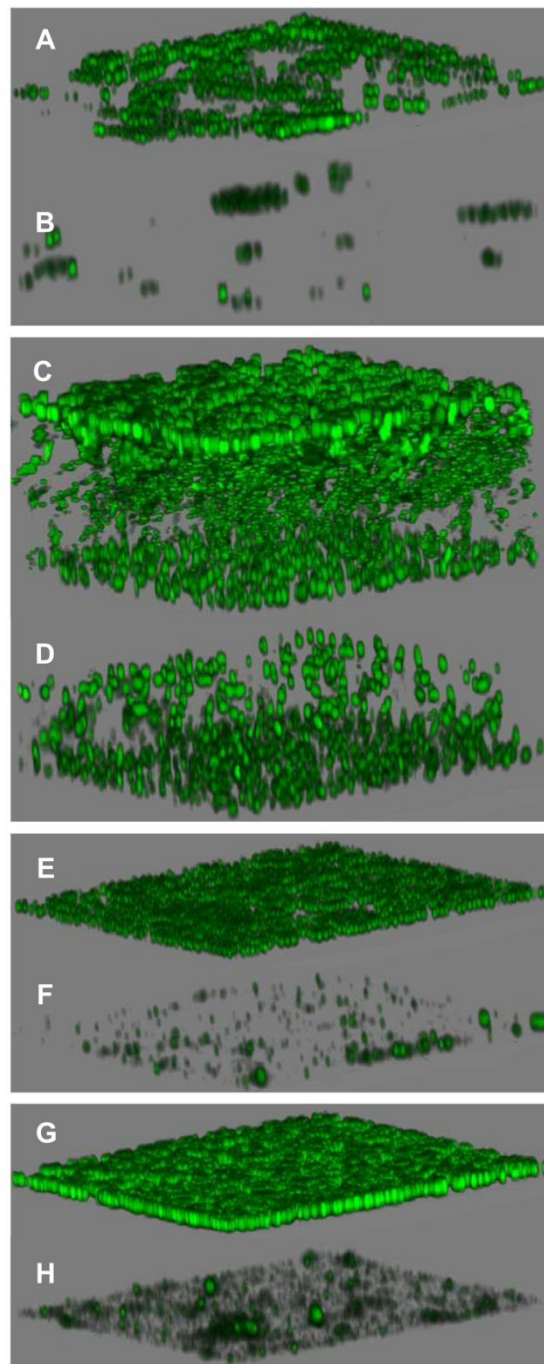

**Figure S2.** Biomass quantification of 5 h biofilms formed by *S. aureus* IPLA16 with other species under proliferation conditions and treated with phage phiIPLA-RODI. Values represent the means  $\pm$  standard deviations of 4 technical replicates corresponding to one representative experiment out of three with the same trends. White bars correspond to the untreated control, while black and grey bars represent samples treated with  $10^9$  or  $10^6$  PFU/well, respectively. Phage-infected samples were compared to their respective untreated controls. \*, P-value<0.05.

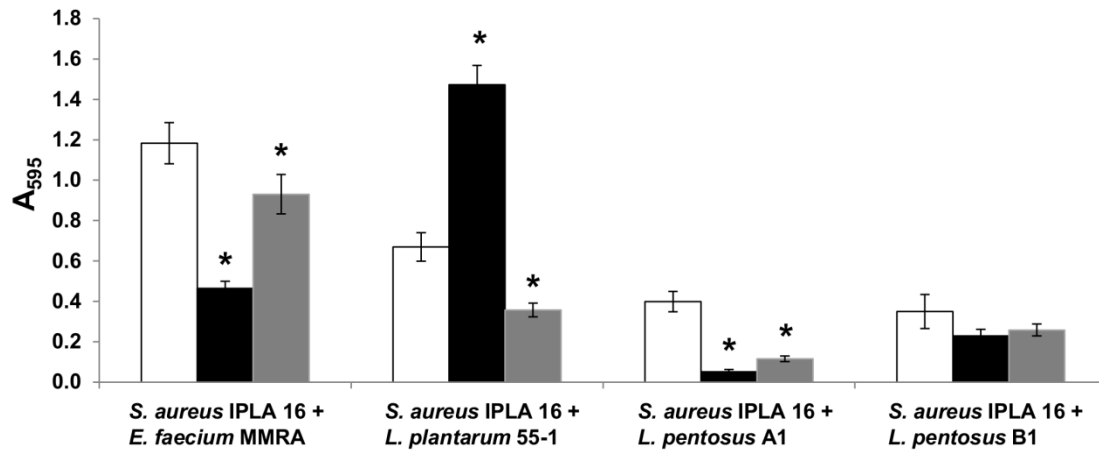

Supplement: AEM.02821-16_zam999117623s1.pdf [file AEM.02821-16_zam999117623s1.pdf]
